# Supplementary material for: The role of the ‘glow phenomenon’ in the preparation of sulfated zirconia catalysts
Source: Royal Society of Chemistry journal article supplement (doi:10.1039/b100364j), 2001-01-01
Supplement: b100364j.doc [file b100364j.doc]

A. Hahn, T. Ressler, R.E. Jentoft, F.C. Jentoft

"The role of the "glow phenomenon" in the preparation of sulfated zirconia catalysts"

Communication Ref. B100364J


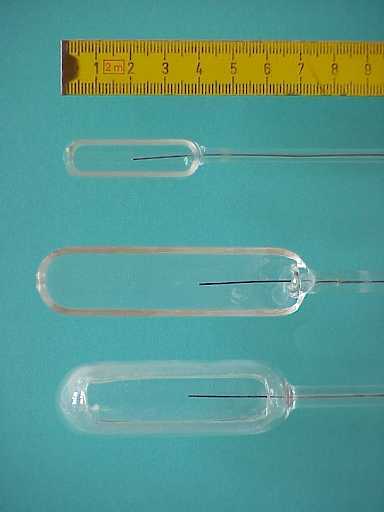


**Boats used for calcination; scale: cm; top: 2.2 ml boat; middle: 8.4 ml boat; bottom: 17.1 ml boat.**
